# Supplementary material
Source: MDPI journal article supplement (https://www.mdpi.com/2313-0105/9/4/199)
Supplement: s1 [file s1]

## Supplementary Material

# Tragacanth, an Exudate Gum as Suitable Aqueous Binder for High Voltage Cathode Material

Daniele Versaci <sup>1,\*</sup>, Oana D. Apostu <sup>2</sup>, Davide Dessantis <sup>3</sup>, Julia Amici <sup>1,\*</sup>, Carlotta Francia <sup>1</sup>, Marco Minella <sup>2</sup> and Silvia Bodoardo <sup>1</sup>

<sup>1</sup> Electrochemistry Group, Department of Applied Science and Technology, Politecnico di Torino, c.so Duca degli Abruzzi 24, 10129 Torino, Italy

<sup>2</sup> Department of Chemistry and NIS Inter-Departmental Centre, University of Torino, via P. Giuria 5, 10125 Torino, Italy

<sup>3</sup> Synergy of Thermo-chemical and Electro-Chemical Power Systems (STEPS), Department of Energy, Politecnico di Torino, c.so Duca degli Abruzzi 24, 10129 Torino, Italy

\* Correspondence: daniele.versaci@polito.it (D.V.); julia.amici@polito.it (J.A.)

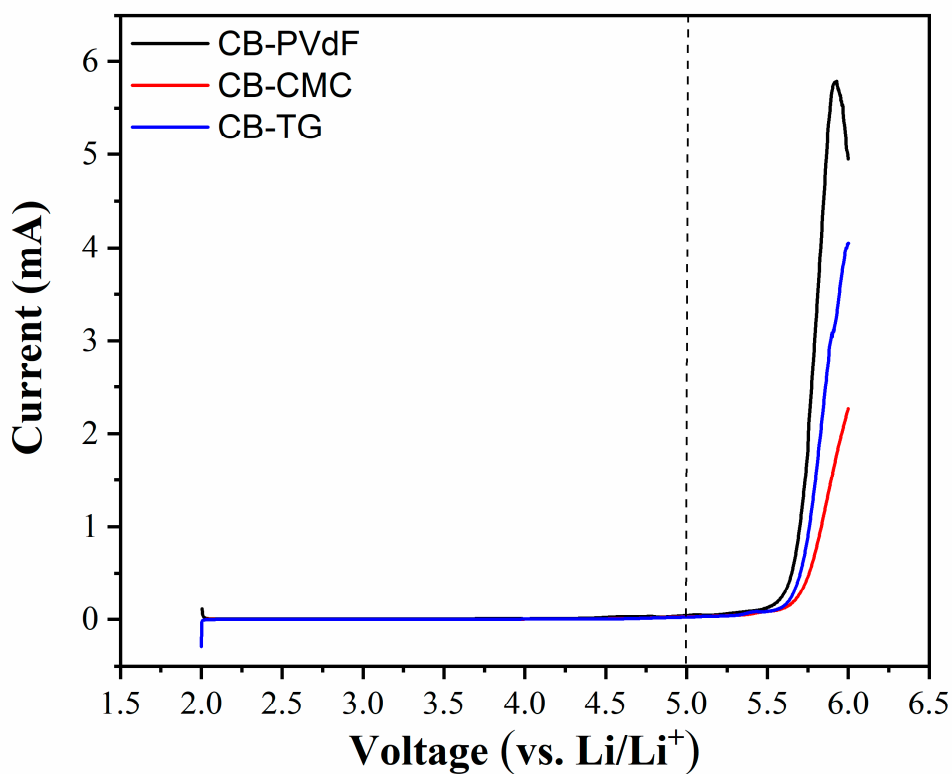

**Figure S1.** Linear sweep voltammetry, performed at 0.1 mV s<sup>-1</sup>, of carbon black (CB) with different binders: PVdF, CMC and TG.

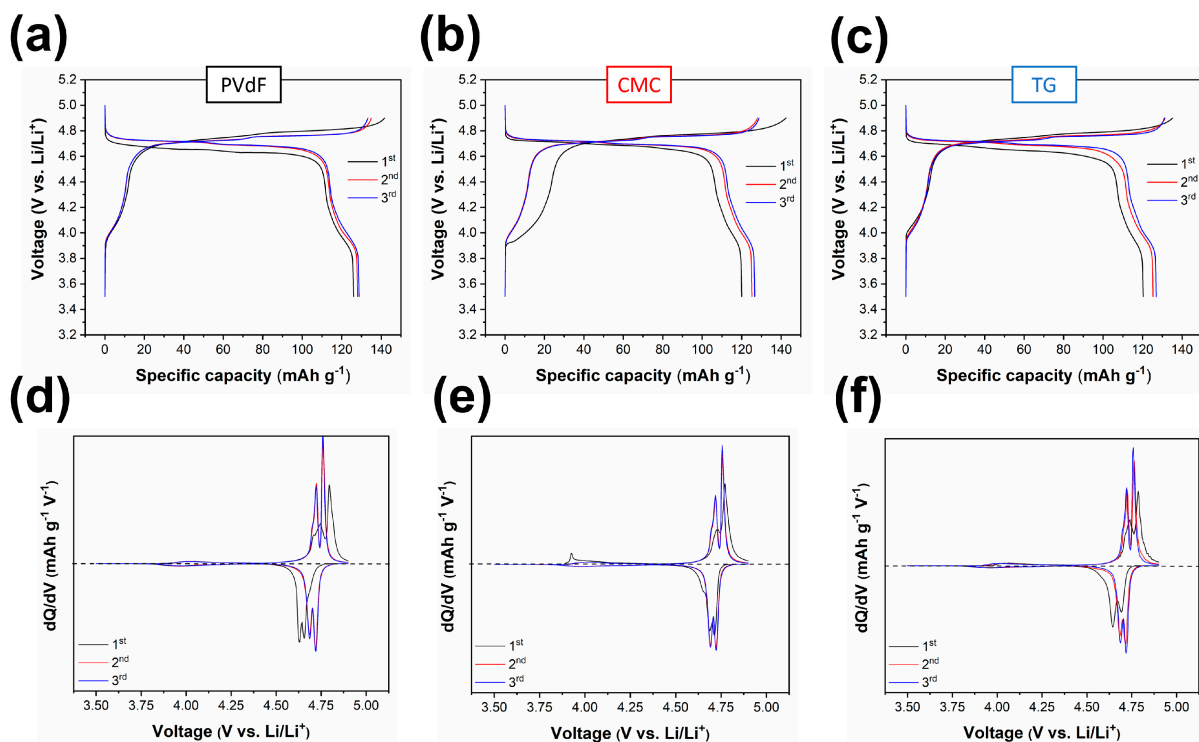

**Figure S2.** Charge–discharge curves of LNMO half cells with different binders for the three initial forming cycles at 0.1C: (a) LNMO-PVdF, (b) LNMO-CMC, (c) LNMO-TG. dQ/dV profiles related to first cycles charge–discharge curves: (d) LNMO-PVdF, (e) LNMO-CMC, (f) LNMO-TG.

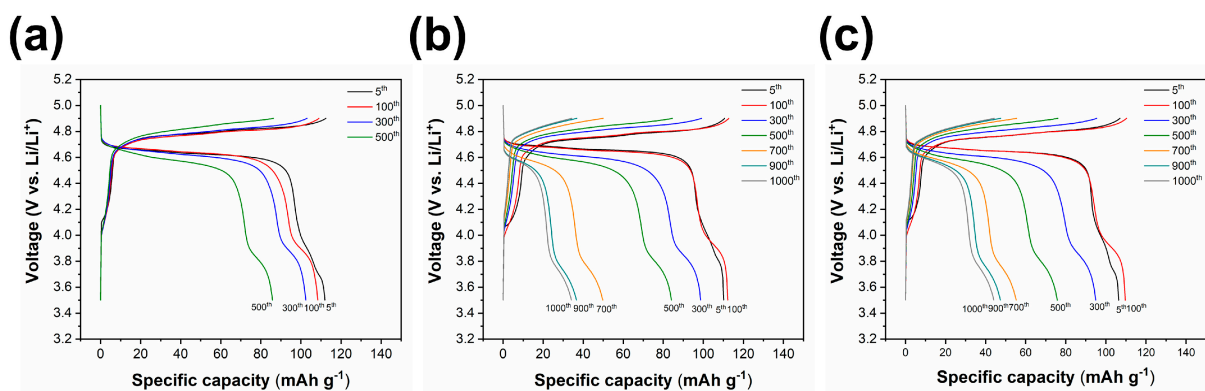

**Figure S3.** Charge–discharge curves of LNMO half cells with different binders: (a) PVdF, (b) CMC, (c) TG for long cycling performance at 1C.

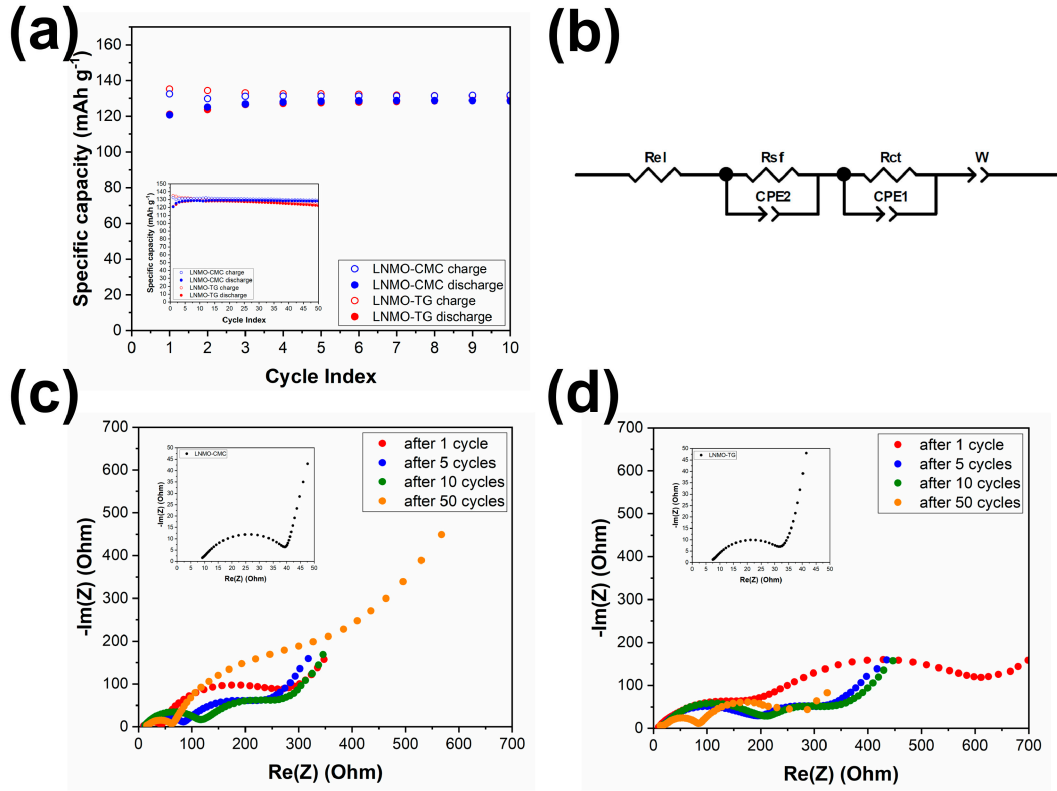

**Figure S4.** Comparison of specific discharge capacity of LNMO electrode containing TG and CMC, cycled at 0.1C for 50 cycles (a), adopted equivalent circuit for fitting (b), Nyquist plots for LNMO-CMC (c) and LNMO-TG (d) electrodes after different cycle numbers.

**Table S1.** Fitted impedance values based on Fig. S4 after different cycles in discharge state, for LNMO-CMC and LNMO-TG cycled at 0.1C.

|                  | CMC      | TG       | CMC      | TG       | CMC      | TG       | CMC | TG  | $\Delta R_{sf}$ | $\Delta R_{sf}$ | $\Delta R_{ct}$ | $\Delta R_{ct}$ |
|------------------|----------|----------|----------|----------|----------|----------|-----|-----|-----------------|-----------------|-----------------|-----------------|
|                  | $R_{el}$ | $R_{el}$ | $R_{sf}$ | $R_{sf}$ | $R_{ct}$ | $R_{ct}$ | $W$ | $W$ | (%)             | (%)             | (%)             | (%)             |
| Pristine         | 9        | 7        | -        | -        | 35       | 31       | 0.8 | 0.9 | -               | -               | -               | -               |
| 1 <sup>st</sup>  | 9        | 8        | 35       | 203      | 210      | 362      | 0.6 | 0.5 | -               | -               | -               | -               |
| 2 <sup>nd</sup>  | 10       | 11       | 57       | 206      | 180      | 122      | 0.6 | 0.5 | + 63            | + 1.5           | - 14            | - 66            |
| 3 <sup>rd</sup>  | 10       | 12       | 72       | 198      | 165      | 114      | 0.7 | 0.5 | + 106           | + 2.5           | - 21            | - 68            |
| 5 <sup>th</sup>  | 10       | 13       | 77       | 186      | 147      | 108      | 0.7 | 0.6 | + 120           | + 8             | - 30            | - 70            |
| 10 <sup>th</sup> | 11       | 14       | 110      | 204      | 155      | 100      | 0.7 | 0.6 | + 214           | + 0.5           | - 26            | - 72            |
| 50 <sup>th</sup> | 15       | 13       | 51       | 63       | 247      | 133      | 0.7 | 0.6 | + 46            | - 69            | + 18            | - 63            |

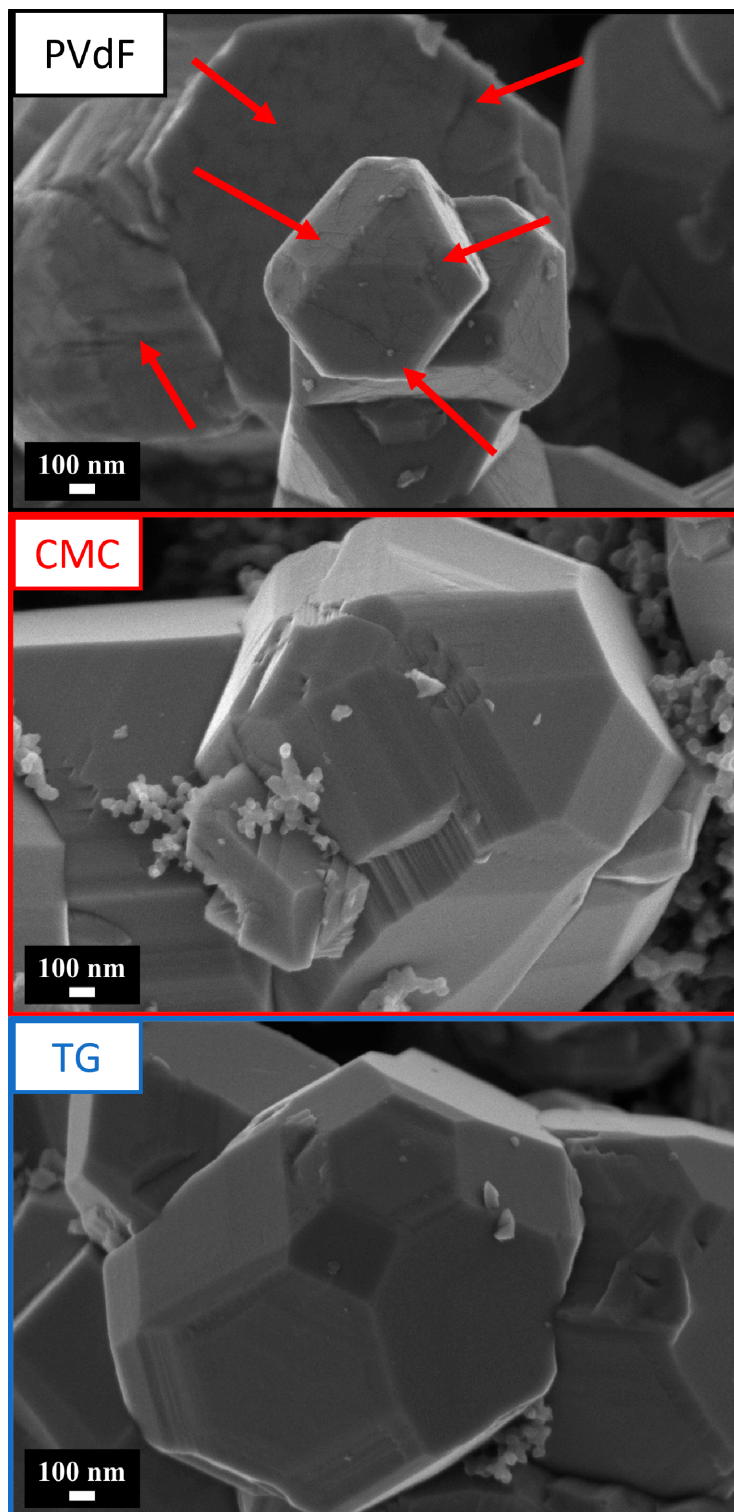

**Figure S5.** FE-SEM micrographs of pristine cathode containing PVdF, CMC and TG. The presence of microcracks in LNMO-PVdF electrode is highlighted by red arrows.
